# Supplementary material for: Tunable dielectric constant of polyimide–barium titanate nanocomposite materials as the gate dielectrics for organic thin film transistor applications
Source: Royal Society of Chemistry journal article supplement (doi:10.1039/c4ra08694e), 2014-01-01
Supplement: c4ra08694e1.pdf [file c4ra08694e1.pdf]

## Electronic Supplementary Information (ESI)

### **Tunable Dielectric Constant of Polyimide-Barium Titanate Nanocomposite Materials as the Gate Dielectrics for Organic Thin Film Transistors Applications**

Yang-Yen Yu,<sup>abc\*</sup> Cheng-Liang Liu,<sup>d\*</sup> Yung-Chih Chen,<sup>a</sup> Yu-Cheng Chiu,<sup>e</sup> and Wen-Chang

Chen<sup>e</sup>

<sup>a</sup> Department of Materials Engineering, Ming Chi University of Technology, New Taipei City 24301, Taiwan. E-mail: [yuyu@mail.mcut.edu.tw](mailto:yuyu@mail.mcut.edu.tw)

<sup>b</sup> Battery Research Center of Green Energy, Ming Chi University of Technology, New Taipei City 24301, Taiwan.

<sup>c</sup> Center for Thin Film Technologies and Applications, Ming Chi University of Technology, New Taipei City 24301, Taiwan.

<sup>d</sup> Department of Chemical and Materials Engineering, National Central University, Taoyuan, 32001 Taiwan. E-mail: [clliu@ncu.edu.tw](mailto:clliu@ncu.edu.tw)

<sup>e</sup> Department of Chemical Engineering, National Taiwan University, Taipei, 10617 Taiwan.

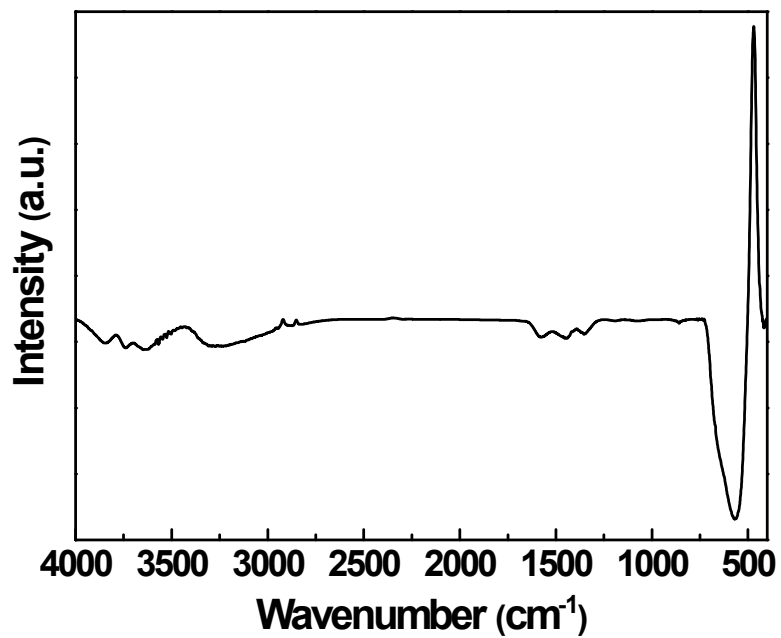

**Fig. S1.** FTIR spectra of BT ceramic.

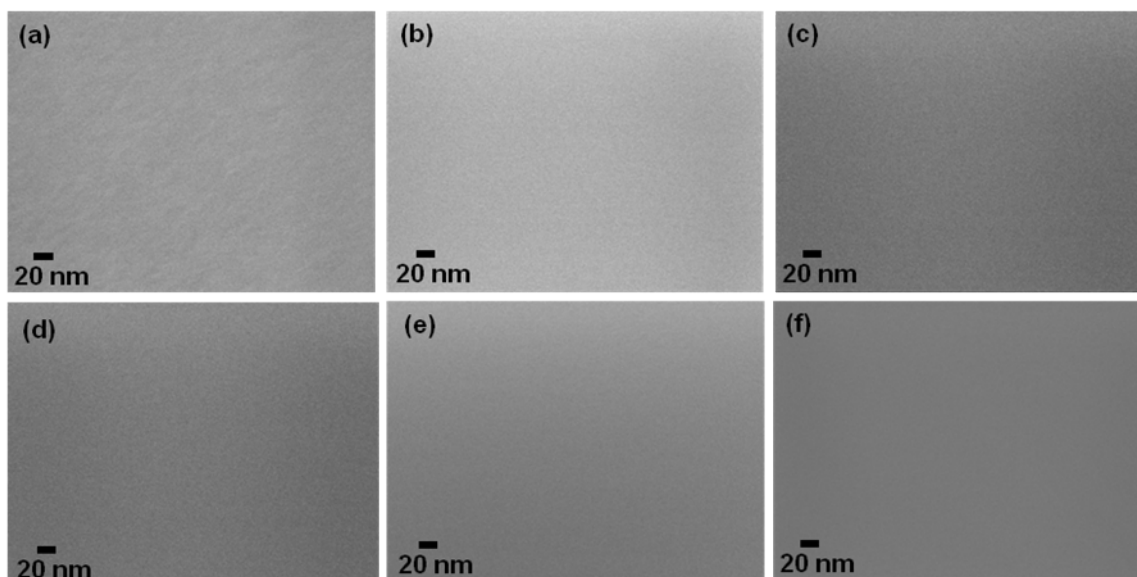

**Fig. S2.** SEM micrograph of dielectric surface: (a) **PI-BT0**, (b) **PI-BT2**, (c) **PI-BT5**, (d) **PI-BT8**, (e) **PI-BT10**, and (f) **PI-BT12**.

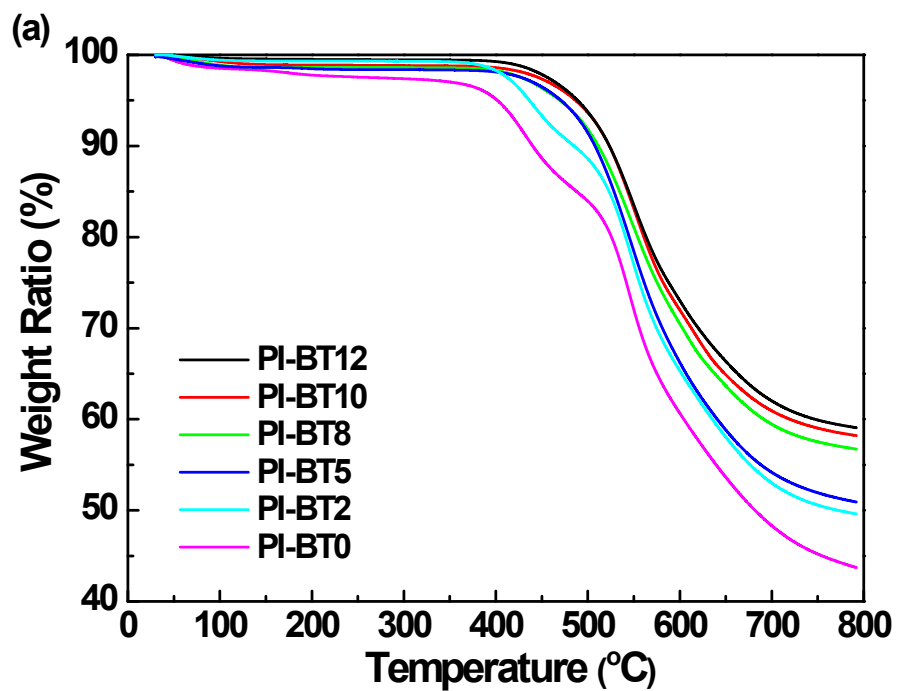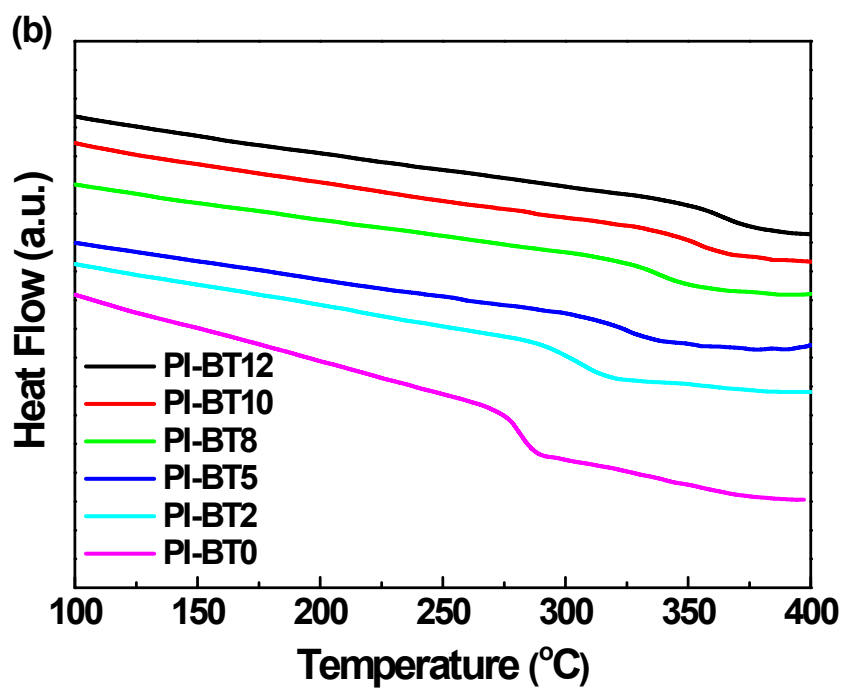

Fig. S3. (a) TGA and (b) DSC curves of PI-BTX hybrid materials.

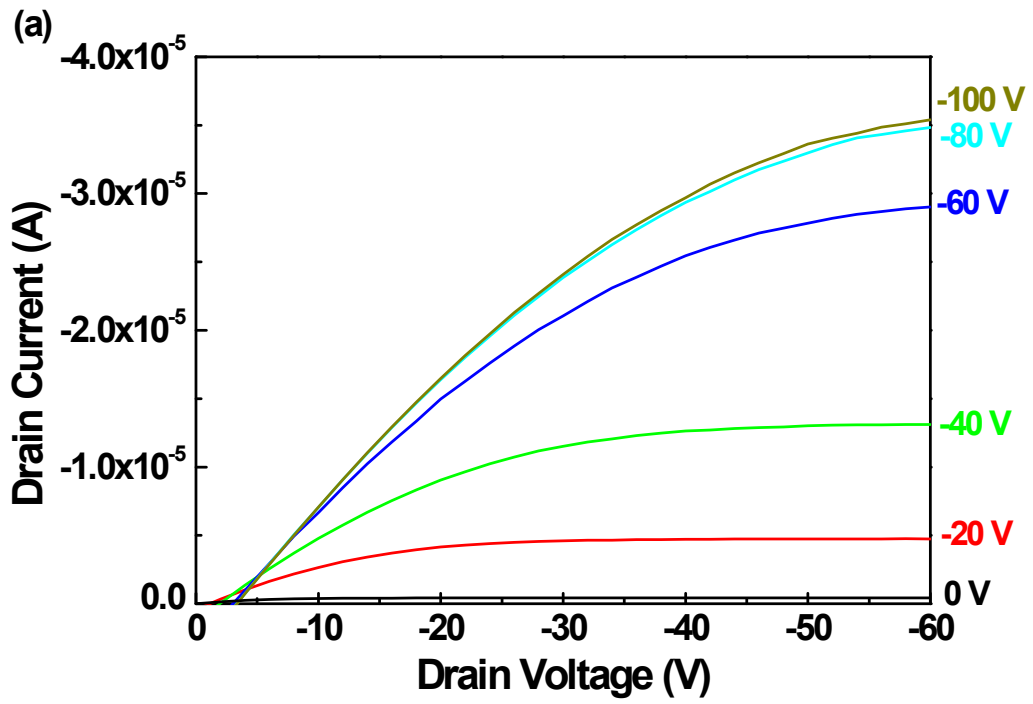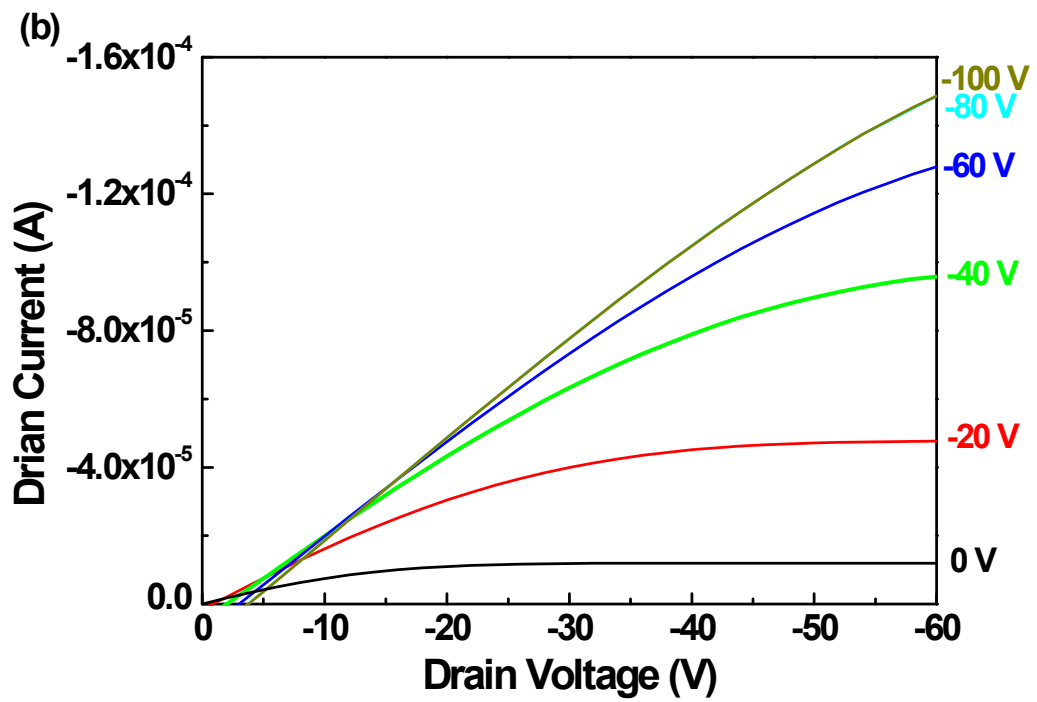

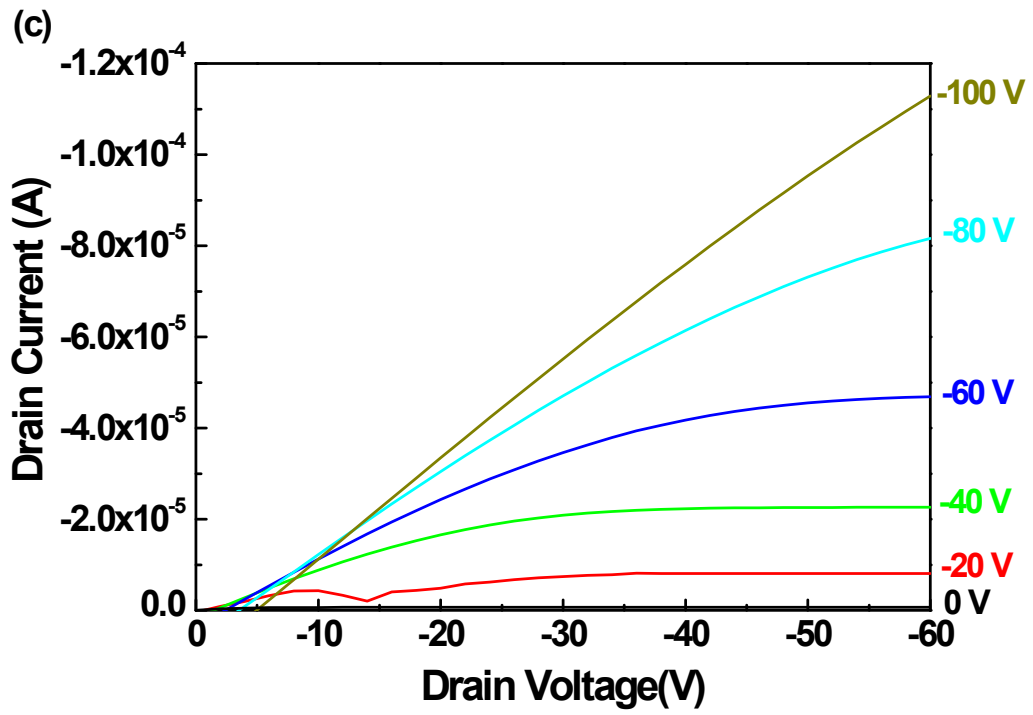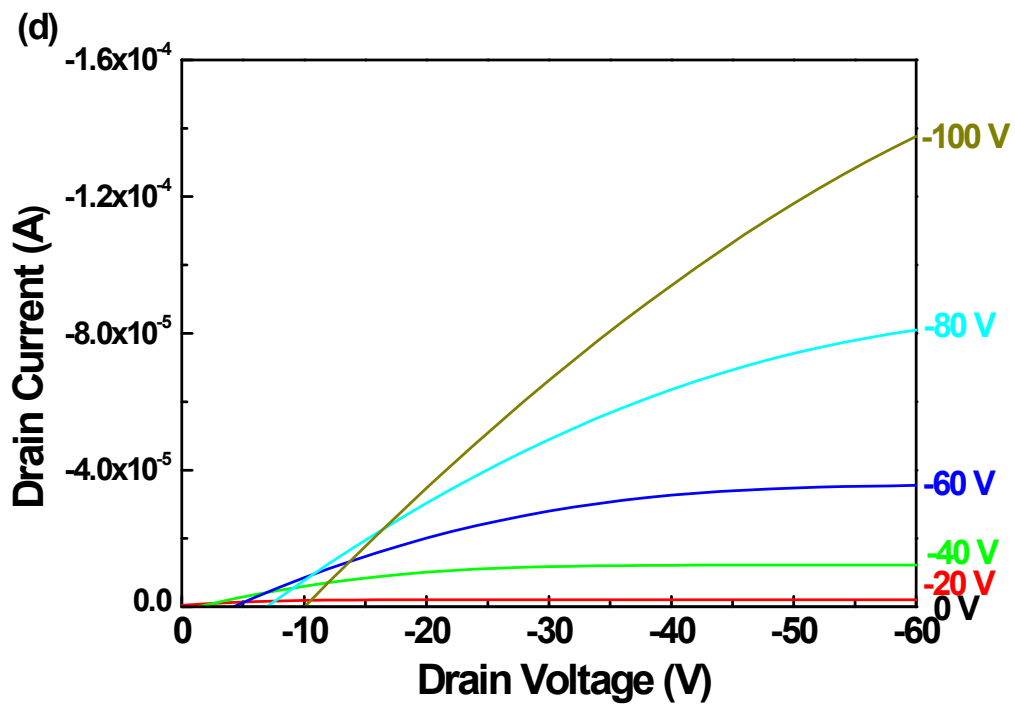

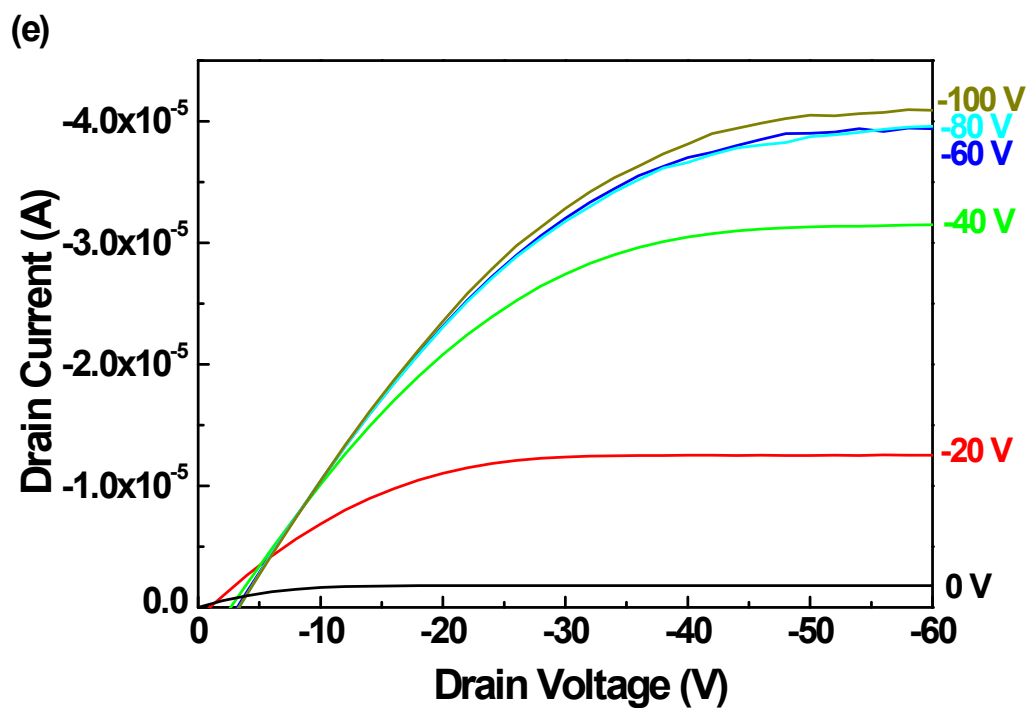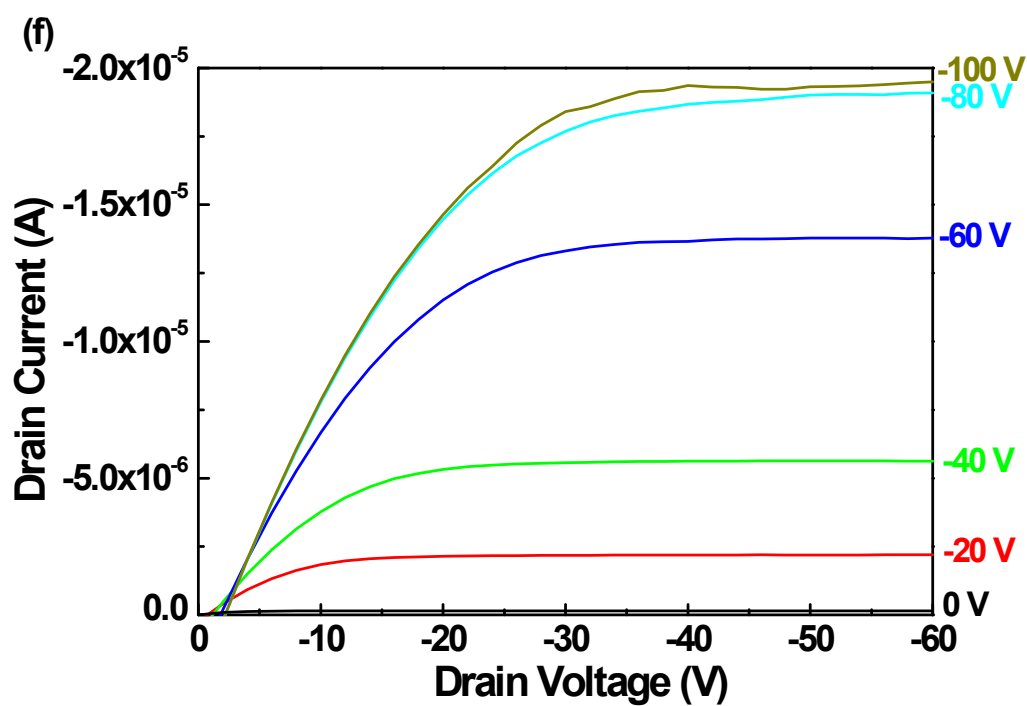

Fig. S4. Output characteristics of the OTFTs based on (a) PI-BT0, (b) PI-BT2, (c) PI-BT5, (d) PI-BT8, (e) PI-BT10, and (f) PI-BT12 hybrid dielectric.

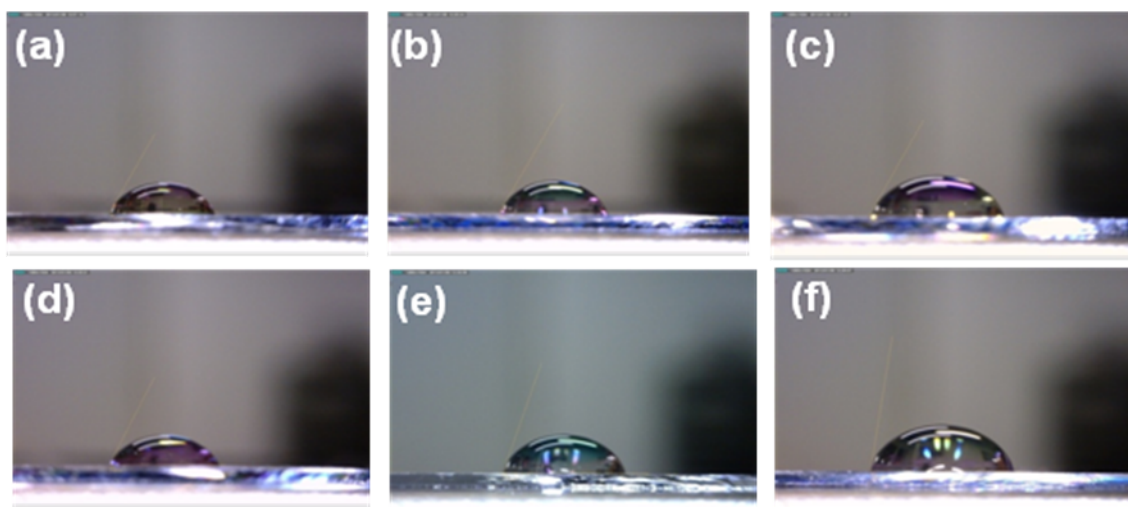

**Fig. S5.** Water contact angles on (a) **PI-BT0**, (b) **PI-BT2**, (c) **PI-BT5**, (d) **PI-BT8**, (e) **PI-BT10** and (f) **PB12** hybrid surface.



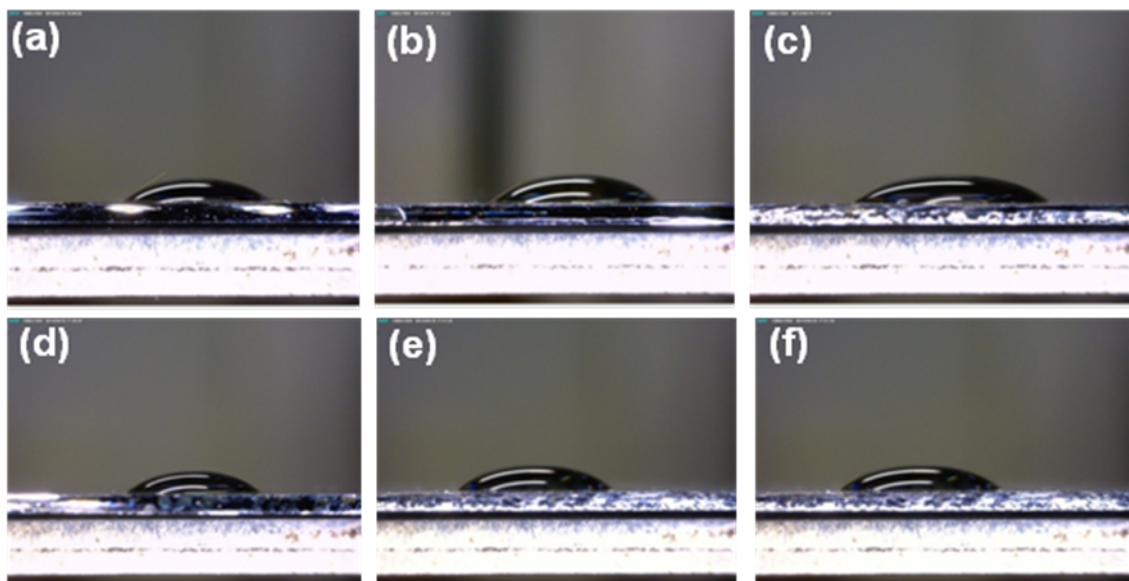

**Fig. S6.** Diiodomethane contact angles on (a) **PI-BT0**, (b) **PI-BT2**, (c) **PI-BT5**, (d) **PI-BT8**, (e) **PI-BT10** and (f) **PI-BT12** hybrid surface.

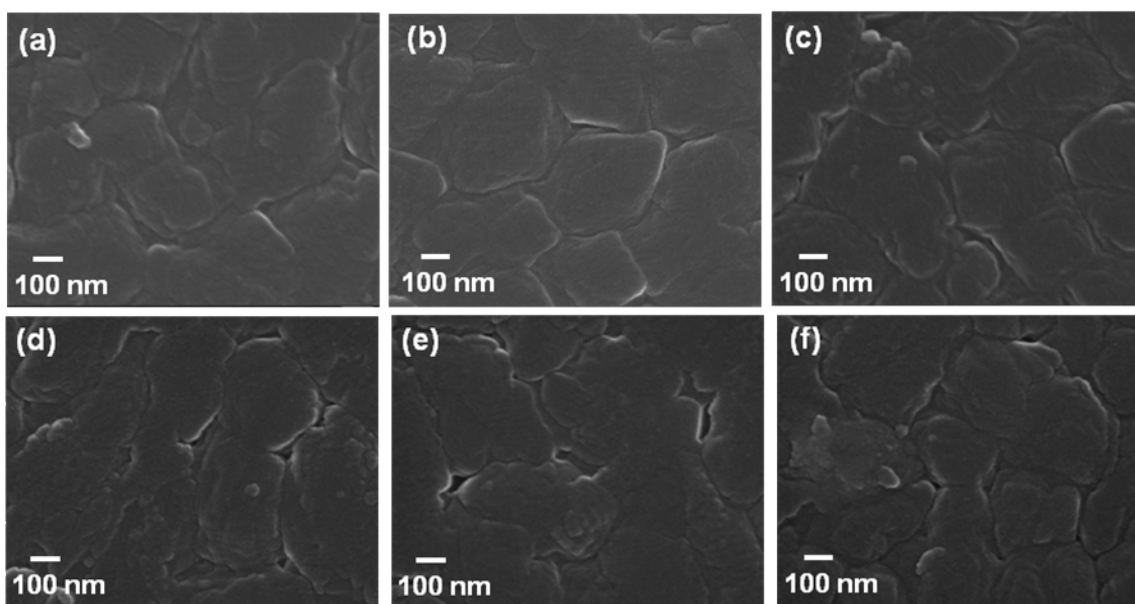

**Fig. S7.** SEM images of pentacene deposited on dielectric films: (a) **PI-BT0**, (b) **PI-BT2**, (c) **PI-BT5**, (d) **PI-BT8**, (e) **PI-BT10** and (f) **PI-BT12**
